# Supplementary material for: Intrinsically stretchable porous liquid–metal conductor for multifunctional electronics applications
Source: Royal Society of Chemistry journal article supplement (doi:10.1039/d3tc03531j), 2023-01-01
Supplement: d3tc03531j6.pdf [file d3tc03531j6.pdf]

## Supporting Information

### **Intrinsically stretchable porous liquid-metal conductor for multifunctional electronics application**

Xin Sun,<sup>‡a,b,c,d</sup> Minghui Yin,<sup>‡a</sup> Ruixue Xu,<sup>‡a</sup> Zhiwei Fu,<sup>a</sup> He Zhu,<sup>a</sup> Qikai Guo,<sup>a</sup> Yang Li,<sup>a</sup> Chao Li,<sup>\*e,f</sup>  
Yan Li,<sup>\*g</sup> and Kai Qian<sup>\*a,b,c,d</sup>

<sup>a</sup> School of Integrated Circuits, Shandong University, Jinan, 250100, China

<sup>b</sup> Shenzhen Research Institute of Shandong University, Shenzhen, 518057, China

<sup>c</sup> Suzhou Research Institute of Shandong University, Suzhou, 215123, China

<sup>d</sup> Lu'an Branch, Anhui Institute of Innovation for Industrial Technology, Lu'an, 237100, China

<sup>e</sup> Department of Neurosurgery, Qilu Hospital of Shandong University, Jinan, 250012, China

<sup>f</sup> Institute of Brain and Brain-Inspired Science, Shandong University, Jinan 250100, China

<sup>g</sup> Department of Urology, Qilu Hospital of Shandong University, Jinan, 250012, China

\*E-mail: [chaoli@sdu.edu.cn](mailto:chaoli@sdu.edu.cn), [yanli@sdu.edu.cn](mailto:yanli@sdu.edu.cn), [kaiqian@sdu.edu.cn](mailto:kaiqian@sdu.edu.cn)

<sup>‡</sup>These authors contributed equally to this work.

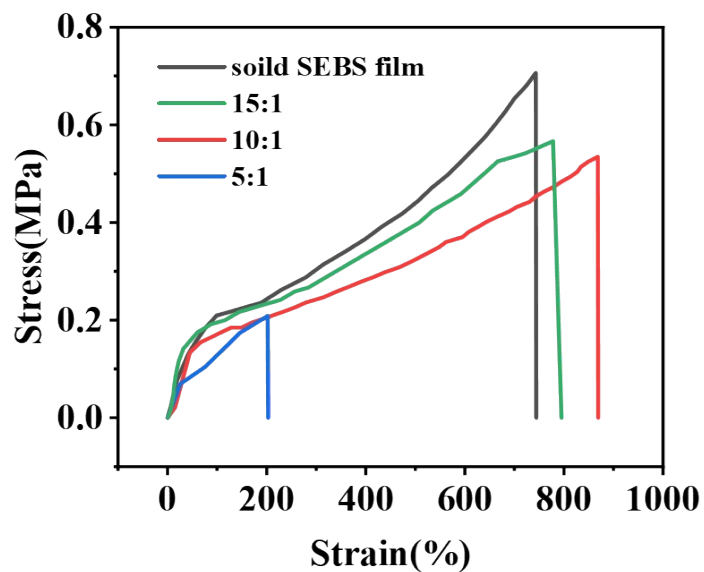

**Fig. S1** Tensile stress–strain curves of SEBS films with different weight ratios of SEBS/sugar.

As shown in Fig. S1, the weight content of sugar would greatly affect the SEBS mechanical properties. When the weight ratios of SEBS/sugar are 15:1 and 10:1, the fracture strain increase with fracture stress decrease, which results from the introduction of porous to alleviate the stress concentration.<sup>S1</sup> However, the fracture stress would greatly decrease with more sugars in the SEBS matrix, resulting from the introduction of more inherent defects and potential crack initiation sites.<sup>S2</sup> Therefore, the mechanical property of porous SEBS can be easily tuned by controlling the weight content of sugar particles, and the weight ratio of SEBS/sugar is 10:1 is chosen for stretchable p-EnGaIn/SEBS conductor.

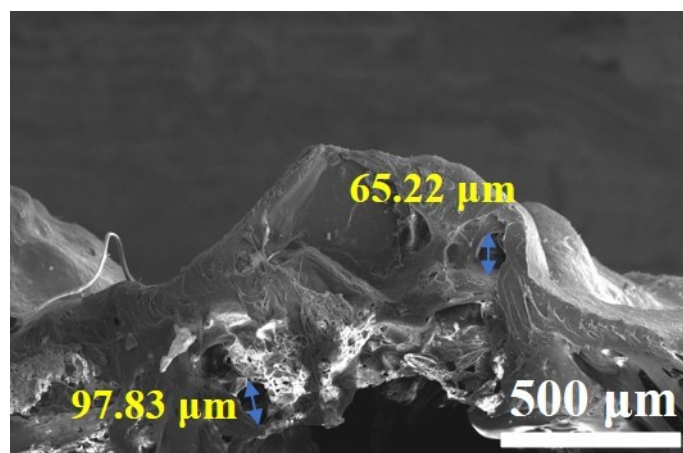

**Fig. S2** Cross-sectional SEM image of porous SEBS.

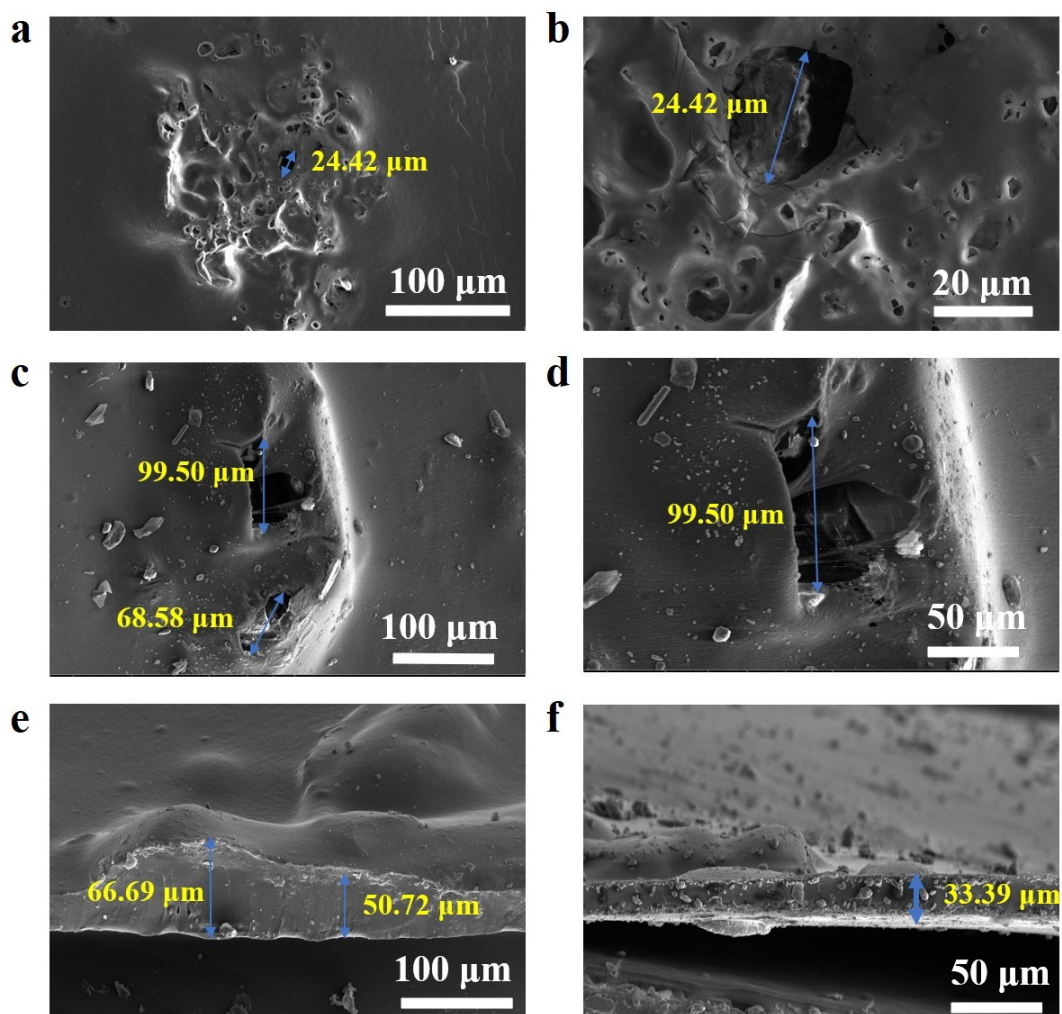

**Fig. S3** SEM image of porous SEBS and its region enlargement before (a, b) and after (c, d) pre-stretching treatment. Cross-sectional SEM image of porous SEBS before (e) and after (f) pre-stretching treatment.

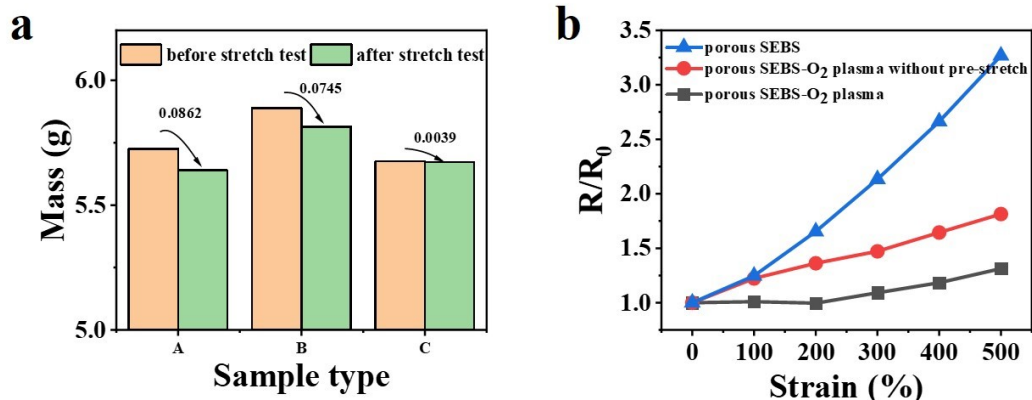

**Fig. S4** (a) Weight change of three samples after ten 500% stretching cycles. (A is the porous SEBS; B is the porous SEBS-O<sub>2</sub>-plasma without pre-stretch; C is the porous SEBS-O<sub>2</sub>-plasma) (b) Resistance changes of EGaIn-based conductors versus tensile strain.

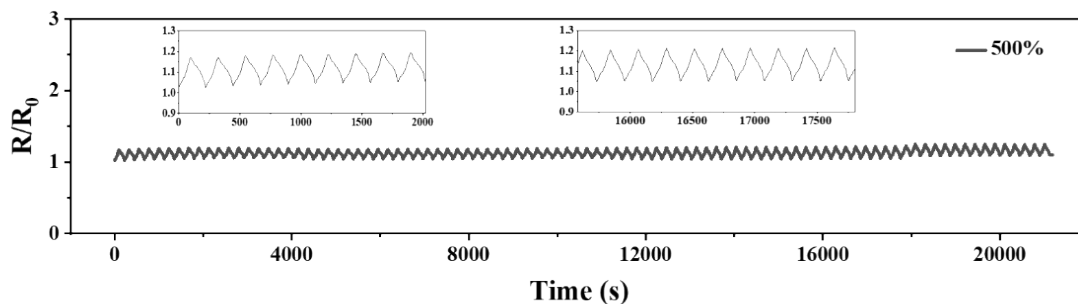

**Fig. S5** 100 cycle tests of stretchable p-EGaIn/SEBS electrode at 500% strain.

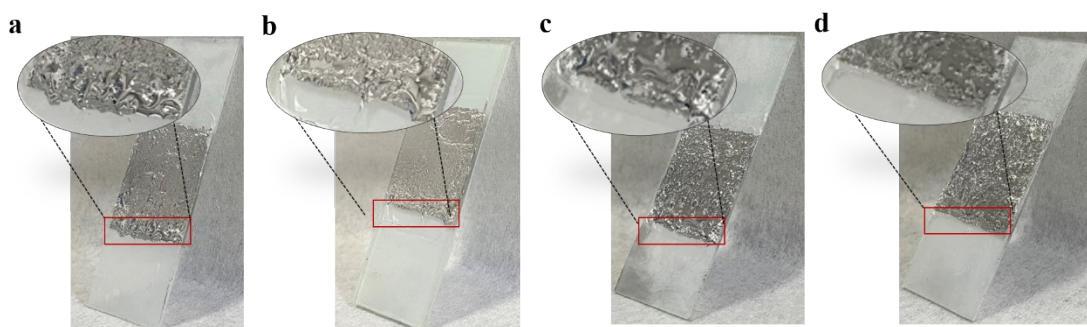

**Fig. S6** Photographs of EGaIn on the solid SEBS film without (a) and with (b) O<sub>2</sub> plasma treatment. Photographs of EGaIn on the 3D porous SEBS film without (c) and with (d) O<sub>2</sub> plasma treatment.

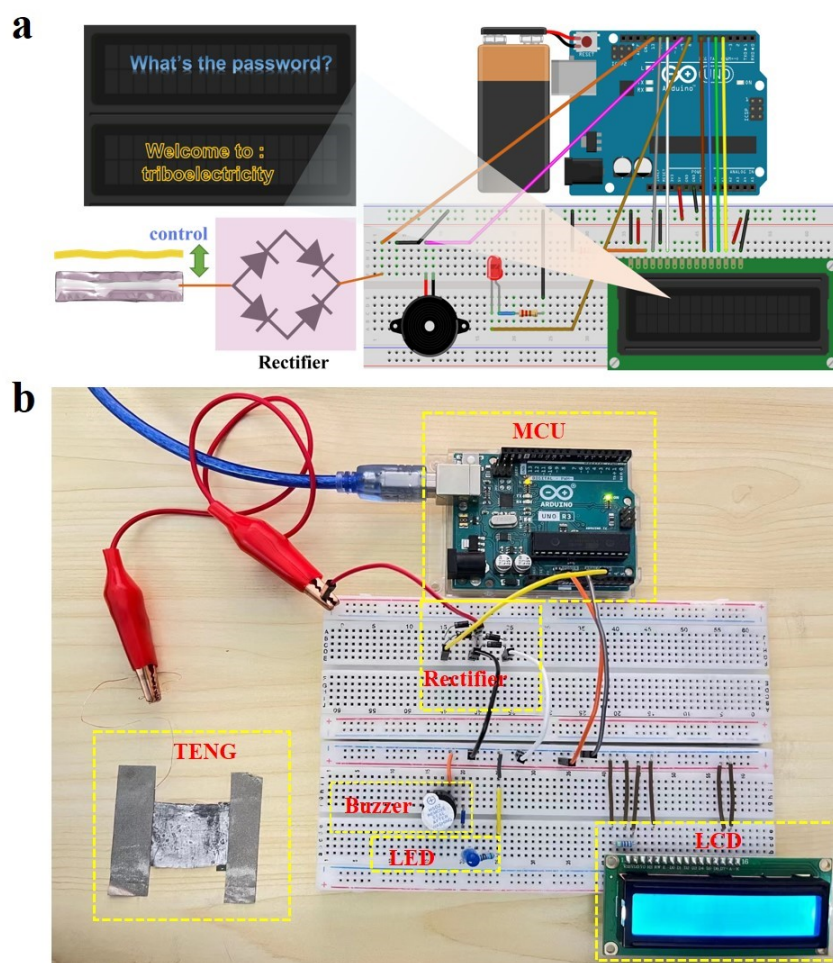

**Fig. S7** Schematic (a) and optical image (b) of decoding system controlled by p-EGaIn/SEBS TENG.

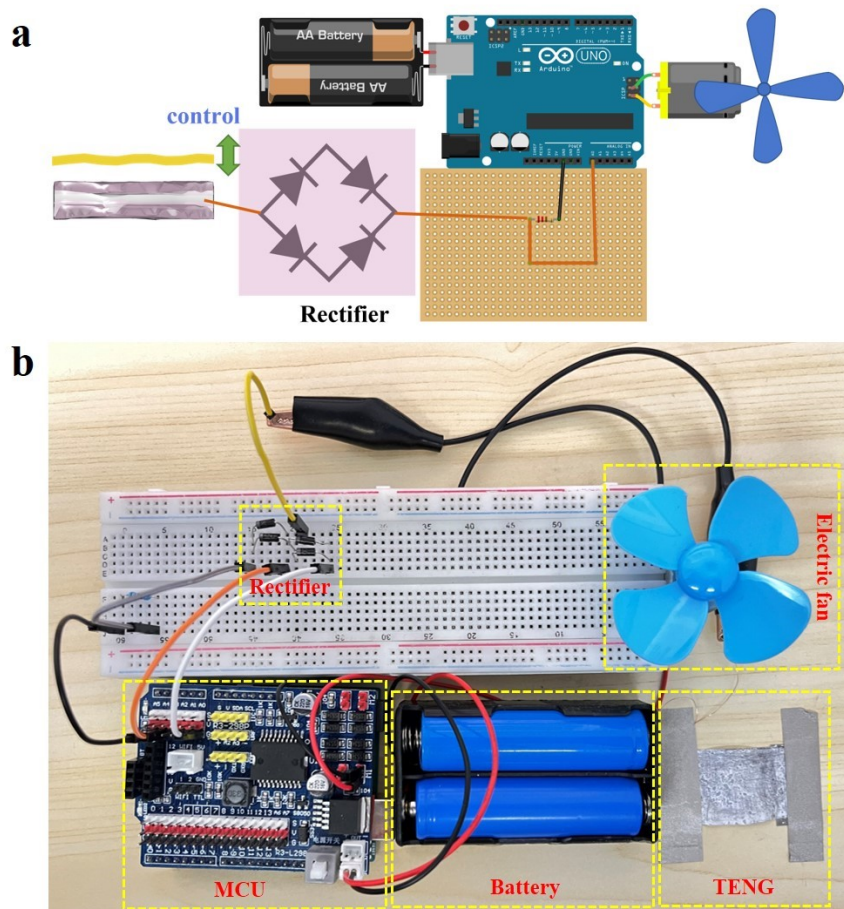

**Fig. S8** Schematic (a) and optical image (b) of p-EGaIn/SEBS TENG for electric fan control.



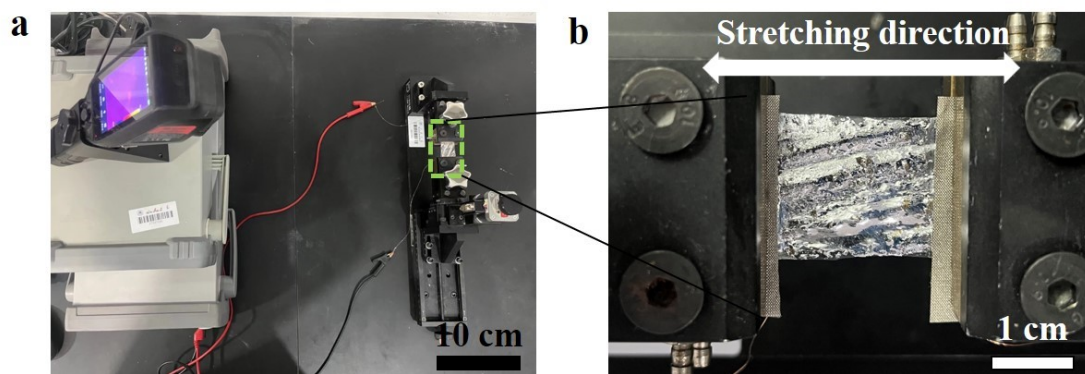

**Fig. S9** Optical photo(a) and enlarged view(b) of p-EGaIn/SEBS conductor heater test.

**Movie S1.** The LEDs in series at 0% strain powered by the p-EGaIn/SEBS-based TENG.

**Movie S2.** The LEDs in series at 300% strain powered by the p-EGaIn/SEBS-based TENG.

**Movie S3.** Decoding system with p-EGaIn/SEBS-based TENG.

**Movie S4.** Electric fan rotation control system with p-EGaIn/SEBS-based TENG.

**Movie S5.** EMI shielding behavior.

## References

- S1. S. Moon, H. K. Park, J. H. Song, S. Cho, J. C. Kim, J. Kim, H. Hwang, H. S. Kim and U. Jeong, *Adv. Mater.*, 2018, **30**, e1801408.2.
- S2. Y. Zhang, Y. Tan, K. Yang, Z. Wu, Z. Zhang, M. Zhang and K. Mai, *J. Mater. Chem. A*, 2016, **4**, 10091-10097.
